# Supplementary material for: Rapid flame synthesis of internal Mo6+ doped TiO2 nanocrystals in situ decorated with highly dispersed MoO3 clusters for lithium ion storage
Source: Royal Society of Chemistry journal article supplement (doi:10.1039/c5nr05586e), 2015-01-01
Supplement: c5nr05586e1.pdf [file c5nr05586e1.pdf]

## Electronic Supplementary Information

### **Rapid Flame Synthesis of Internal Mo<sup>6+</sup> Doped TiO<sub>2</sub> Nanocrystals *In-Situ* Decorated with Highly Dispersed MoO<sub>3</sub> Clusters for Lithium Ion Storage**

*Yunfeng Li, Yanjie Hu,\* Jianhua Shen, Haibo Jiang, Guoquan Min,\* Shengjie Qiu, Zhitang Song, Zhuo Sun, and Chunzhong Li\**

Dr. Y. Li, Prof. Y. Hu, Dr. J. Shen, Dr. H. Jiang, Prof. C. Li

Key Laboratory for Ultrafine Materials of Ministry of Education, School of Materials Science and Engineering,  
East China University of Science & Technology, Shanghai 200237, China

E-mail: [czli@ecust.edu.cn](mailto:czli@ecust.edu.cn), [huyanjie@ecust.edu.cn](mailto:huyanjie@ecust.edu.cn)

Dr. Y. Li, Prof. G. Min, S. Qiu

Shanghai Nanotechnology Promotion Center, Shanghai 200237, China

E-mail: [guoquan@snpcc.org.cn](mailto:guoquan@snpcc.org.cn)

Prof. Z. Song

Shanghai Institute of Micro-System and Information Technology, Chinese Academy of Sciences, Shanghai  
200050, China

Prof. Z. Sun

Department of Physics, East China Normal University, Shanghai 200062, China

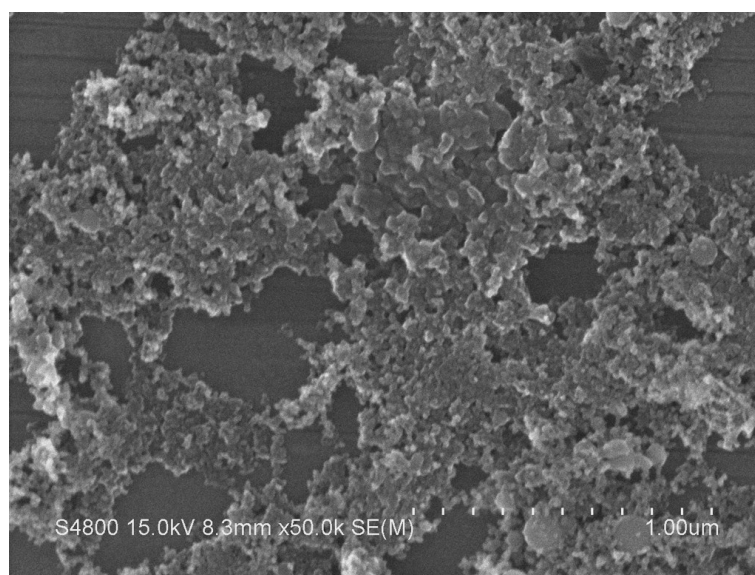

**Figure S1** SEM image of the  $\text{Mo}^{6+}\text{-TiO}_2/\text{MoO}_3$  NHs.

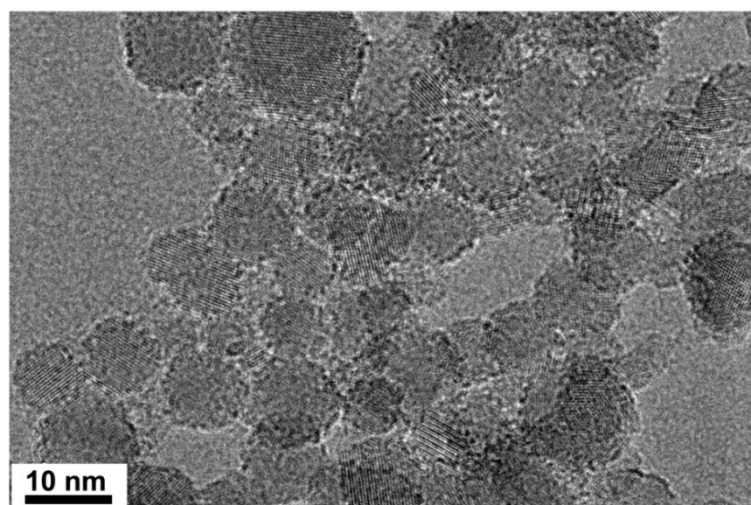

**Figure S2** TEM image of the  $\text{Mo}^{6+}\text{-TiO}_2/\text{MoO}_3$  NHs.

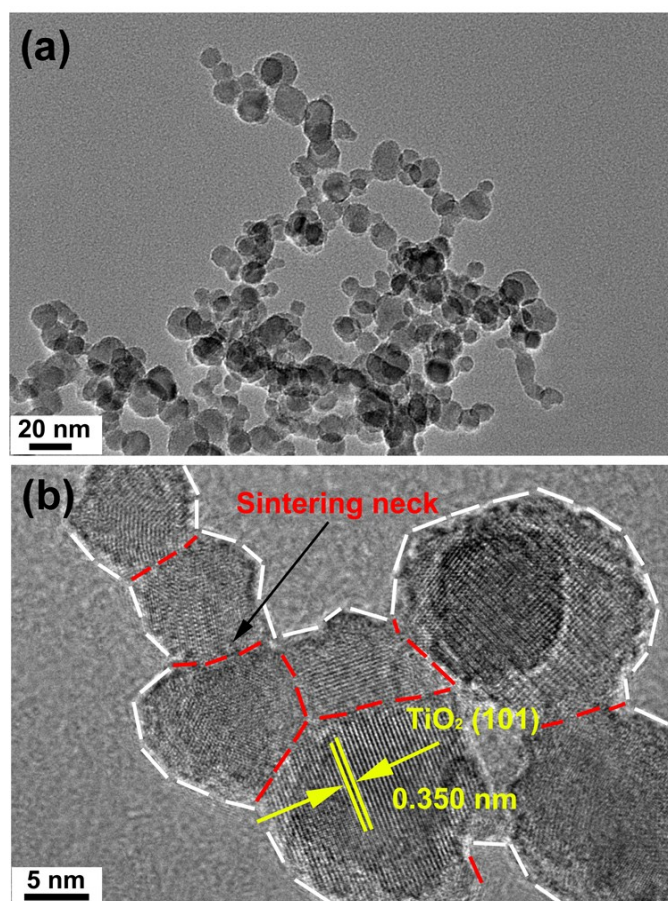

**Figure S3** (a) TEM image and (b) HRTEM image of flame made pristine TiO<sub>2</sub> particles.

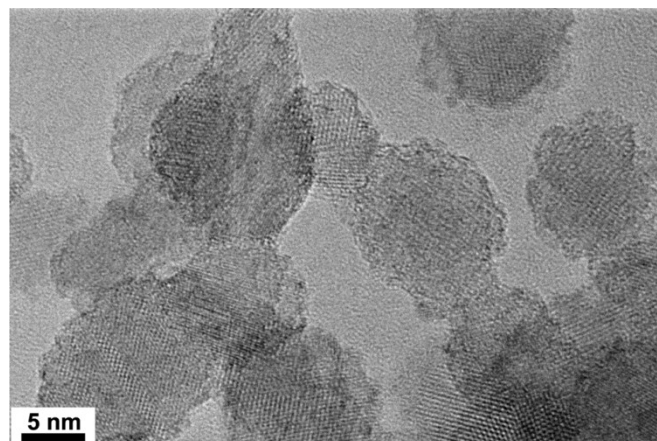

**Figure S4** TEM image of Mo<sup>6+</sup>-TiO<sub>2</sub>/MoO<sub>3</sub> hybrid with designed 15 at.% Mo.

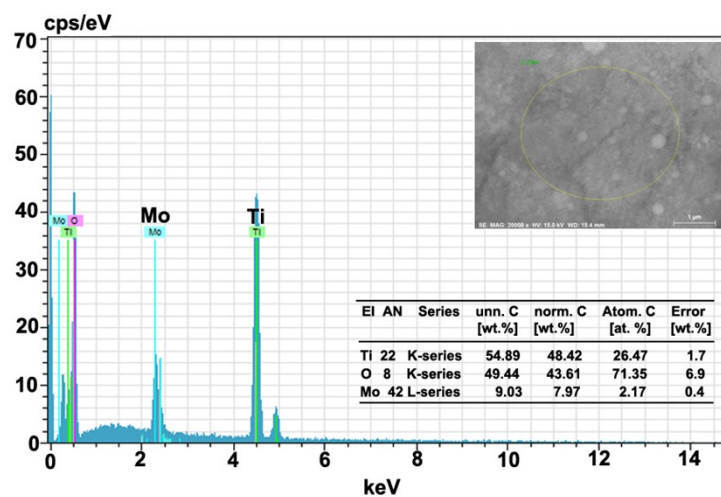

**Figure S5** EDX of  $\text{Mo}^{6+}\text{-TiO}_2/\text{MoO}_3$  hybrid with designed 10 at.% Mo.

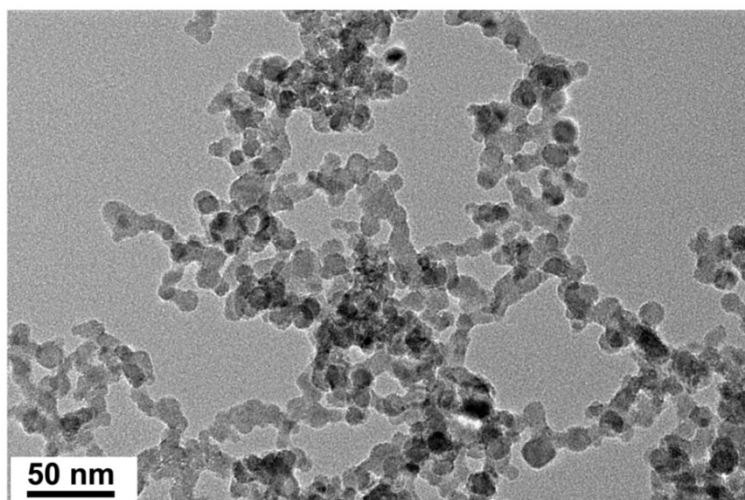

**Figure S6** TEM image of the  $\text{Mo}^{6+}\text{-TiO}_2/\text{MoO}_3$  NHs after sulfuration with thiourea at 400°C for 3 h.

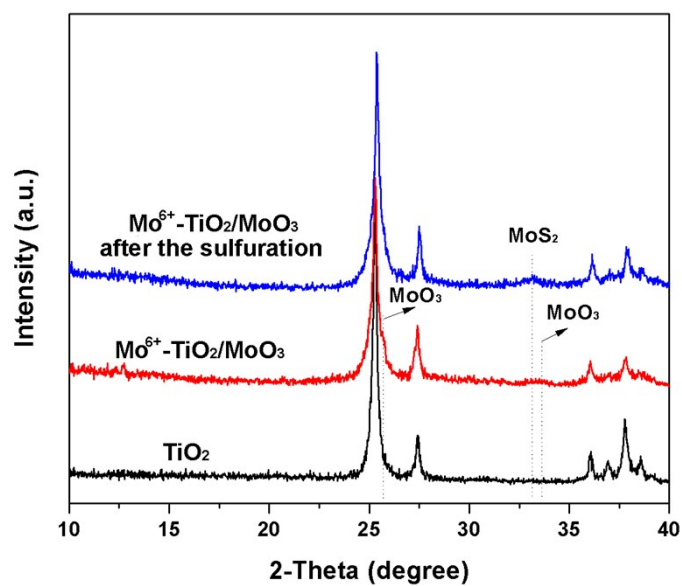

**Figure S7** XRD patterns of TiO<sub>2</sub>, and Mo<sup>6+</sup>-TiO<sub>2</sub>/MoO<sub>3</sub> NHs before and after the sulfuration.

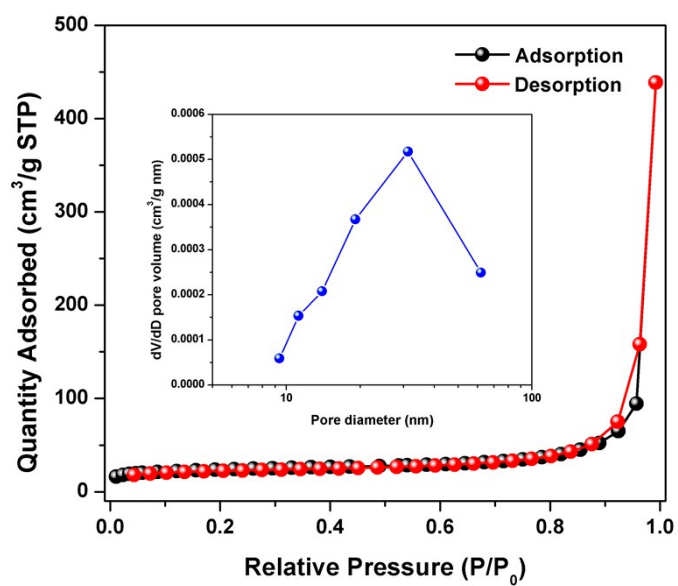

**Figure S8** Nitrogen adsorption/desorption isotherm of the Mo<sup>6+</sup>-TiO<sub>2</sub>/MoO<sub>3</sub> NHs (inset: the corresponding pore distribution profiles).

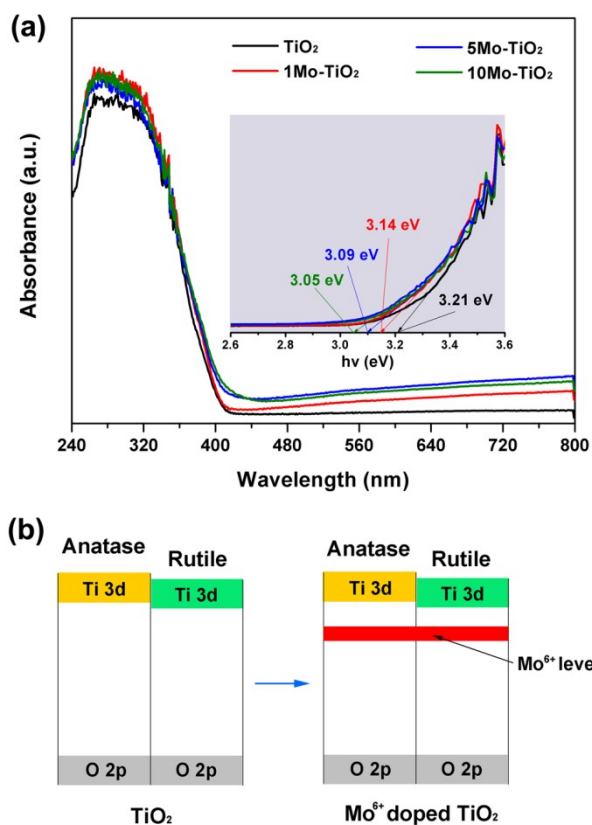

**Figure S9** (a) UV-vis absorption spectra of the TiO<sub>2</sub>, 1Mo-TiO<sub>2</sub>, 5Mo-TiO<sub>2</sub> and 10Mo-TiO<sub>2</sub> samples (the inset curves show the corresponding band gap, (b) schematic of the band structures of TiO<sub>2</sub> and Mo<sup>6+</sup> doped TiO<sub>2</sub>.

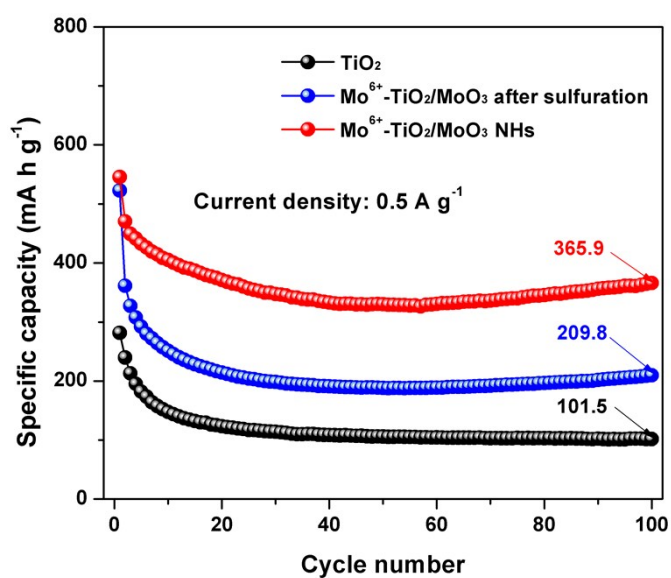

**Figure S10** Cycling performance of TiO<sub>2</sub>, and Mo<sup>6+</sup>-TiO<sub>2</sub>/MoO<sub>3</sub> NHs before and after the sulfuration at a current density of 0.5 A g<sup>-1</sup>.
